# Supplementary material for: Evaluation of ChatGPT-5 Responses in Obstetric and Gynecological Emergencies: Concordance, Readability, and Clinical Reliability
Source: Research Square preprint supplement (doi:10.21203/rs.3.rs-7547376/v1), 2025-09-24
Supplement: Supplementary file 1 [file 17722dfb1017f1e0ddc3dd60.docx]

Obstetric Emergency Scenarios and ChatGPT-5 Answers

## Case 1. Postpartum Hemorrhage – Uterine Atony

**Scenario 1:** A patient, 15 minutes after a vaginal delivery at 38 weeks, was admitted to the emergency department with sudden massive vaginal bleeding. Past medical and obstetric history was unremarkable. Blood pressure was 80/50 mmHg, heart rate 128 bpm, SpO₂ 92%. On examination, the uterus was atonic and the placenta had completely delivered. Laboratory tests showed Hb 7.2 g/dL and fibrinogen 120 mg/dL. Ultrasound demonstrated intrauterine clot formation.

**1. What is the most likely diagnosis?**
→ Early postpartum hemorrhage due to uterine atony.

**2. What investigations would you order to confirm or support the diagnosis?**
→ Complete blood count, PT/aPTT/INR, fibrinogen level, D-dimer, blood type and cross-match, arterial blood gas.

**3. How would you classify this patient’s hemodynamic status?**
→ Hemodynamically unstable (BP 80/50 mmHg, HR 128 bpm, Hb 7.2 g/dL, signs of hypovolemic shock).

**4. What is your initial management approach?**
→ Immediate resuscitation (airway protection, oxygen, two large-bore IV lines, rapid IV fluid replacement, and massive transfusion protocol), uterine massage, bimanual compression, uterotonics (oxytocin, if no response then methylergometrine/carboprost/misoprostol), bladder emptying.

**5. What are your advanced management options?**
→ Intrauterine balloon tamponade (Bakri), uterine artery embolization, B-Lynch suture, uterine or hypogastric artery ligation, and hysterectomy as a last resort. Intensive care monitoring, fibrinogen replacement with cryoprecipitate or fibrinogen concentrate, multidisciplinary approach (obstetrics, anesthesia, hematology, intensive care).

**Case 2.** Eclampsia

**Scenario 2:** A patient at 35 weeks of gestation presented to the emergency department with a generalized tonic–clonic seizure following a 24-hour history of headache and visual disturbances. There was no previous diagnosis of preeclampsia. Vital signs were: BP 180/110 mmHg, HR 98 bpm, SpO₂ 95%. Urinalysis showed 3+ proteinuria. Fetal heart rate was 100 bpm.

**1. What is the most likely diagnosis?**
→ Eclampsia.

**2. What investigations would you order to confirm or support the diagnosis?**
→ Complete blood count, renal and liver function tests, coagulation profile, electrolytes, urinalysis for protein quantification, and fetal assessment (non-stress test, ultrasound with Doppler).

**3. How would you classify this patient’s hemodynamic status?**
→ Hemodynamically unstable due to severe hypertension and seizure.

**4. What is your initial management approach?**
→ Airway and breathing support, oxygen, IV access, magnesium sulfate for seizure control and prophylaxis, antihypertensives (labetalol, hydralazine, or nifedipine), and cautious fluid replacement.

**5. What are your advanced management options?**
→ Definitive treatment is delivery. Maternal ICU care, continuous monitoring, management of complications (HELLP, DIC, renal failure), and multidisciplinary approach involving obstetrics, anesthesia, and neonatology.

**Case 3.** HELLP Syndrome

**Scenario 3:** A patient at 34 weeks of gestation presented with severe epigastric pain, nausea, and vomiting. Blood pressure was 160/100 mmHg and heart rate 105 bpm. Laboratory results showed platelets 65,000/µL, AST 210 U/L, LDH 780 U/L, and Hb 9 g/dL. Urinalysis revealed proteinuria. Ultrasound demonstrated intrauterine growth restriction (IUGR).

**1. What is the most likely diagnosis?**
→ HELLP syndrome (Hemolysis, Elevated Liver enzymes, Low Platelets).

**2. What investigations would you order to confirm or support the diagnosis?**
→ CBC, peripheral smear, coagulation profile, renal and liver function tests, haptoglobin, uric acid, urine protein quantification, and fetal assessment (NST, Doppler studies).

**3. How would you classify this patient’s hemodynamic status?**
→ At risk and clinically unstable due to severe hypertension, thrombocytopenia, and hemolysis.

**4. What is your initial management approach?**
→ Stabilization with IV access, antihypertensive therapy, magnesium sulfate for seizure prophylaxis, blood product support (platelets, plasma if needed), and close maternal-fetal monitoring.

**5. What are your advanced management options?**
→ Definitive treatment is delivery. Multidisciplinary management in ICU, correction of coagulopathy, control of hypertension, and neonatal intensive care support due to IUGR and prematurity.

## Case 4. Shoulder Dystocia

**Scenario 4:** A patient at 40 weeks of gestation was undergoing vaginal delivery of a macrosomic infant (4200 g). The fetal head delivered, but the shoulders did not. Maternal vital signs were stable. Fetal heart rate dropped to 90 bpm. An obstetric nurse and the anesthesia team were present in the delivery room.

**1. What is the most likely diagnosis?**
→ Shoulder dystocia.

**2. What investigations would you order to confirm or support the diagnosis?**
→ It is a clinical diagnosis; no additional investigations are required during the emergency.

**3. How would you classify this patient’s hemodynamic status?**
→ Mother is stable; fetus is compromised (bradycardia).

**4. What is your initial management approach?**
→ Call for immediate assistance, perform the McRoberts maneuver, and apply suprapubic pressure.

**5. What are your advanced management options?**
→ Woods’ screw or Rubin maneuver, delivery of the posterior arm, Gaskin (all-fours) maneuver, Zavanelli maneuver with emergency cesarean section if all else fails, followed by neonatal resuscitation.

## Case 5. Amniotic Fluid Embolism

**Scenario 5:** A patient in the active phase of labor suddenly developed dyspnea, chest pain, and cyanosis. On arrival, blood pressure was 60/40 mmHg, heart rate 140 bpm, SpO₂ 75%, and the patient was confused. ECG showed sinus tachycardia. Emergency CT angiography revealed findings consistent with amniotic fluid embolism.

**1. What is the most likely diagnosis?**
→ Amniotic fluid embolism.

**2. What investigations would you order to confirm or support the diagnosis?**
→ CBC, coagulation profile (screen for DIC), arterial blood gas, chest X-ray, echocardiography, and blood cultures to exclude other causes.

**3. How would you classify this patient’s hemodynamic status?**
→ Hemodynamically unstable (severe shock with hypoxemia).

**4. What is your initial management approach?**
→ Immediate airway protection and endotracheal intubation, 100% oxygen, IV fluid resuscitation, vasopressor/inotropic support, and initiation of blood products if coagulopathy is present.

**5. What are your advanced management options?**
→ ICU admission, advanced circulatory support (including ECMO if available), correction of DIC with blood component therapy, urgent delivery if undelivered, and multidisciplinary management (obstetrics, anesthesia, intensive care, hematology).

## Case 6. Placental Abruption with DIC

**Scenario 6:** A patient at 37 weeks of gestation presented with heavy vaginal bleeding following placental abruption. On arrival, blood pressure was 85/55 mmHg and heart rate 126 bpm. Laboratory results showed Hb 6.8 g/dL, prolonged PT and aPTT, fibrinogen 80 mg/dL, and elevated D-dimer. Clinically, the patient had widespread petechiae and ecchymoses.

**1. What is the most likely diagnosis?**
→ Placental abruption complicated by disseminated intravascular coagulation (DIC).

**2. What investigations would you order to confirm or support the diagnosis?**
→ CBC, coagulation profile, fibrinogen, D-dimer, blood type and cross-match, renal and liver function tests, arterial blood gas, and ultrasound to assess intrauterine contents.

**3. How would you classify this patient’s hemodynamic status?**
→ Hemodynamically unstable (hypovolemic shock with coagulopathy).

**4. What is your initial management approach?**
→ Immediate resuscitation: airway and oxygen, two large-bore IV lines, rapid infusion of crystalloids, blood transfusion with activation of the massive transfusion protocol, uterotonic agents if atony coexists.

**5. What are your advanced management options?**
→ ICU admission, correction of coagulopathy with blood components (FFP, cryoprecipitate, platelets, fibrinogen concentrate), expedited delivery if undelivered, surgical interventions (compression sutures, vessel ligation, hysterectomy if uncontrolled), and multidisciplinary management (obstetrics, anesthesia, hematology, intensive care).

## Case 7. Uterine Rupture

**Scenario 7:** A pregnant patient with a history of previous cesarean section developed sudden abdominal pain during oxytocin induction, followed by loss of fetal heart sounds. On arrival, blood pressure was 70/40 mmHg and heart rate 150 bpm. Abdominal examination revealed a rigid (“board-like”) abdomen, and ultrasound demonstrated free fluid in the abdomen.

**1. What is the most likely diagnosis?**
→ Uterine rupture.

**2. What investigations would you order to confirm or support the diagnosis?**
→ This is primarily a clinical diagnosis. Supportive tests: CBC, coagulation profile, cross-match for blood products, and urgent ultrasound to confirm hemoperitoneum.

**3. How would you classify this patient’s hemodynamic status?**
→ Hemodynamically unstable (hemorrhagic shock).

**4. What is your initial management approach?**
→ Immediate resuscitation: airway and oxygen, IV fluid resuscitation with crystalloids and blood transfusion, prepare for emergency laparotomy.

**5. What are your advanced management options?**
→ Emergency laparotomy with surgical repair of the rupture or hysterectomy if bleeding cannot be controlled, activation of massive transfusion protocol, ICU admission, and multidisciplinary care (obstetrics, anesthesia, neonatology, intensive care).

## Case 8. Ruptured Ectopic Pregnancy

**Scenario 8:** A patient with 7 weeks of amenorrhea presented with sudden onset of lower abdominal pain and syncope. On arrival, blood pressure was 80/50 mmHg, heart rate 140 bpm, and SpO₂ 91%. Transvaginal ultrasound demonstrated free fluid in the pouch of Douglas. Serum β-hCG was 2500 IU/L. Hemoglobin was 7.5 g/dL.

**1. What is the most likely diagnosis?**
→ Ruptured ectopic pregnancy with hemoperitoneum.

**2. What investigations would you order to confirm or support the diagnosis?**
→ CBC, quantitative β-hCG, coagulation profile, blood type and cross-match, serum electrolytes, and repeat ultrasound if needed.

**3. How would you classify this patient’s hemodynamic status?**
→ Hemodynamically unstable (hemorrhagic shock).

**4. What is your initial management approach?**
→ Immediate resuscitation with airway support, oxygen, large-bore IV access, rapid infusion of crystalloids and blood products, activation of massive transfusion if required.

**5. What are your advanced management options?**
→ Emergency laparotomy (typically salpingectomy), ICU admission, and multidisciplinary care (obstetrics, anesthesia, intensive care).

## Case 9. Ovarian Torsion

**Scenario 9:** A patient at 12 weeks of gestation presented with sudden-onset right lower quadrant pain and nausea. On examination, right adnexal tenderness was noted. Blood pressure was 110/70 mmHg and heart rate 95 bpm. Ultrasound showed the right ovary enlarged to 7 cm with absent Doppler flow. WBC count was 13,000/mm³.

**1. What is the most likely diagnosis?**
→ Ovarian torsion.

**2. What investigations would you order to confirm or support the diagnosis?**
→ CBC, CRP, electrolytes, coagulation profile, and pelvic ultrasound with Doppler (already suggestive). MRI can be considered if diagnosis remains uncertain.

**3. How would you classify this patient’s hemodynamic status?**
→ Hemodynamically stable.

**4. What is your initial management approach?**
→ IV access, analgesia, hydration, antiemetics, and preparation for surgery.

**5. What are your advanced management options?**
→ Emergency laparoscopy or laparotomy for detorsion, oophorectomy if necrosis is present, and continued maternal-fetal monitoring.

## Case 10. Septic Abortion

**Scenario 10:** A patient on the third day following a spontaneous abortion presented with fever (39.5 °C), foul-smelling vaginal discharge, and abdominal pain. On arrival, blood pressure was 90/60 mmHg and heart rate 120 bpm. Laboratory results showed WBC 22,000/mm³ and CRP 160 mg/L. Abdominal examination revealed rebound tenderness.

**1. What is the most likely diagnosis?**
→ Septic abortion with peritonitis risk.

**2. What investigations would you order to confirm or support the diagnosis?**
→ CBC, blood cultures, vaginal/endometrial cultures, coagulation profile, renal and liver function tests, electrolytes, blood gas, and pelvic ultrasound to detect retained products of conception or intra-abdominal fluid.

**3. How would you classify this patient’s hemodynamic status?**
→ Hemodynamically unstable (sepsis with septic shock risk).

**4. What is your initial management approach?**
→ Immediate resuscitation: airway and oxygen, IV fluids, broad-spectrum IV antibiotics (e.g., clindamycin + gentamicin ± ampicillin) after cultures, and close monitoring.

**5. What are your advanced management options?**
→ Surgical evacuation of retained products, laparotomy if peritonitis develops, ICU admission, vasopressor support if septic shock ensues, and multidisciplinary management (obstetrics, anesthesia, intensive care, infectious diseases).

## Case 11. Tubo-Ovarian Abscess

**Scenario 11:** A patient presented with a 3-day history of fever (38.5 °C), lower abdominal pain, and vaginal discharge. On examination, blood pressure was 110/70 mmHg and heart rate 100 bpm. Laboratory tests revealed WBC 17,000/mm³ and elevated CRP. Pelvic ultrasound demonstrated a 6 cm complex adnexal mass.

**1. What is the most likely diagnosis?**
→ Tubo-ovarian abscess.

**2. What investigations would you order to confirm or support the diagnosis?**
→ CBC, CRP/ESR, blood cultures, vaginal/endocervical swabs, renal and liver function tests, coagulation profile, and pelvic MRI or CT if ultrasound findings are equivocal.

**3. How would you classify this patient’s hemodynamic status?**
→ Hemodynamically stable.

**4. What is your initial management approach?**
→ Broad-spectrum intravenous antibiotics (e.g., cephalosporin + doxycycline + metronidazole), analgesia, and IV fluids.

**5. What are your advanced management options?**
→ Image-guided percutaneous drainage or surgical drainage (laparoscopy/laparotomy) if there is no improvement, abscess rupture, or sepsis. ICU admission if septic shock develops. Multidisciplinary approach involving gynecology, radiology, infectious diseases, and intensive care.

## Case 12. Ruptured Hemorrhagic Ovarian Cyst

**Scenario 12:** A patient presented with sudden-onset pelvic pain. On arrival, blood pressure was 95/60 mmHg and heart rate 118 bpm. Hemoglobin had dropped from 10 g/dL to 7.5 g/dL. Ultrasound demonstrated free fluid in the abdomen.

**1. What is the most likely diagnosis?**
→ Ruptured hemorrhagic ovarian cyst with hemoperitoneum.

**2. What investigations would you order to confirm or support the diagnosis?**
→ CBC, coagulation profile, blood type and cross-match, β-hCG to exclude pregnancy, electrolytes, and repeat ultrasound if needed.

**3. How would you classify this patient’s hemodynamic status?**
→ Hemodynamically unstable (hypovolemic shock risk).

**4. What is your initial management approach?**
→ Immediate resuscitation with oxygen, IV access, fluids, blood transfusion, and monitoring of vital signs and urine output.

**5. What are your advanced management options?**
→ Emergency laparoscopy or laparotomy for hemostasis and cystectomy; oophorectomy if uncontrollable bleeding or necrosis. ICU monitoring if significant hemorrhage.

## Case 13. Acute Massive Vaginal Bleeding

**Scenario 13:** A patient presented to the emergency department with sudden massive vaginal bleeding. On arrival, blood pressure was 85/55 mmHg, heart rate 125 bpm, and hemoglobin 7 g/dL. Speculum examination revealed active bleeding.

**1. What is the most likely diagnosis?**
→ Acute abnormal uterine bleeding (AUB) of non-pregnant cause.

**2. What investigations would you order to confirm or support the diagnosis?**
→ CBC, coagulation profile, blood type and cross-match, β-hCG to exclude pregnancy, pelvic ultrasound, and thyroid/other endocrine evaluation if stable.

**3. How would you classify this patient’s hemodynamic status?**
→ Hemodynamically unstable (hemorrhagic shock risk).

**4. What is your initial management approach?**
→ Immediate resuscitation with IV access, crystalloids, blood transfusion, oxygen, and hemostatic measures (uterotonics or high-dose IV estrogen, tranexamic acid).

**5. What are your advanced management options?**
→ Uterine tamponade (balloon), surgical curettage, uterine artery embolization, or hysterectomy if refractory. ICU monitoring may be required.

## Case 14. Cervical Cancer with Hemorrhage

**Scenario 14:** A patient with a known history of cervical cancer presented with massive vaginal bleeding. On arrival, blood pressure was 90/60 mmHg, heart rate 130 bpm, and hemoglobin 6.5 g/dL. Pelvic examination revealed active bleeding from tumor tissue.

**1. What is the most likely diagnosis?**
→ Cervical cancer with tumor-related hemorrhage.

**2. What investigations would you order to confirm or support the diagnosis?**
→ CBC, coagulation profile, blood type and cross-match, renal and liver function tests, and pelvic imaging (ultrasound, MRI, or CT) if stable.

**3. How would you classify this patient’s hemodynamic status?**
→ Hemodynamically unstable (severe anemia and hemorrhage).

**4. What is your initial management approach?**
→ Immediate resuscitation with airway and oxygen support, IV access, crystalloids, blood transfusion, vaginal packing, and local hemostatic agents (topical tranexamic acid, Monsel’s solution, cauterization if feasible).

**5. What are your advanced management options?**
→ Definitive measures may include pelvic artery embolization, surgical ligation, urgent hysterectomy (if operable), or palliative radiotherapy for bleeding control. ICU monitoring and multidisciplinary management (gynecologic oncology, interventional radiology, anesthesia, intensive care).

## Case 15. Pelvic Trauma with Hemorrhage

**Scenario 15:** A patient was brought to the emergency department after a motor vehicle accident with pelvic trauma and vaginal bleeding. On arrival, blood pressure was 75/40 mmHg, heart rate 150 bpm, and SpO₂ 88%. FAST ultrasound showed free fluid in the abdomen, and a pelvic fracture was suspected.

**1. What is the most likely diagnosis?**
→ Pelvic fracture with massive hemorrhage and intra-abdominal bleeding.

**2. What investigations would you order to confirm or support the diagnosis?**
→ CBC, coagulation profile, blood type and cross-match, arterial blood gas, pelvic X-ray or CT scan if stable, and extended FAST (eFAST).

**3. How would you classify this patient’s hemodynamic status?**
→ Hemodynamically unstable (hemorrhagic shock).

**4. What is your initial management approach?**
→ Immediate resuscitation: airway protection, oxygen, two large-bore IV lines, crystalloids, massive transfusion protocol, application of a pelvic binder, and preparation for surgical intervention.

**5. What are your advanced management options?**
→ Emergency laparotomy if intra-abdominal bleeding is significant, pelvic external fixation, angiographic embolization of bleeding vessels, ICU care, and multidisciplinary trauma team management.
